# Supplementary material for: Multiple links between 5-methylcytosine content of mRNA and translation
Source: PubMed Central journal article supplement (PMC7158060; doi:10.1186/s12915-020-00769-5), 2020-04-15

Figure S3A:

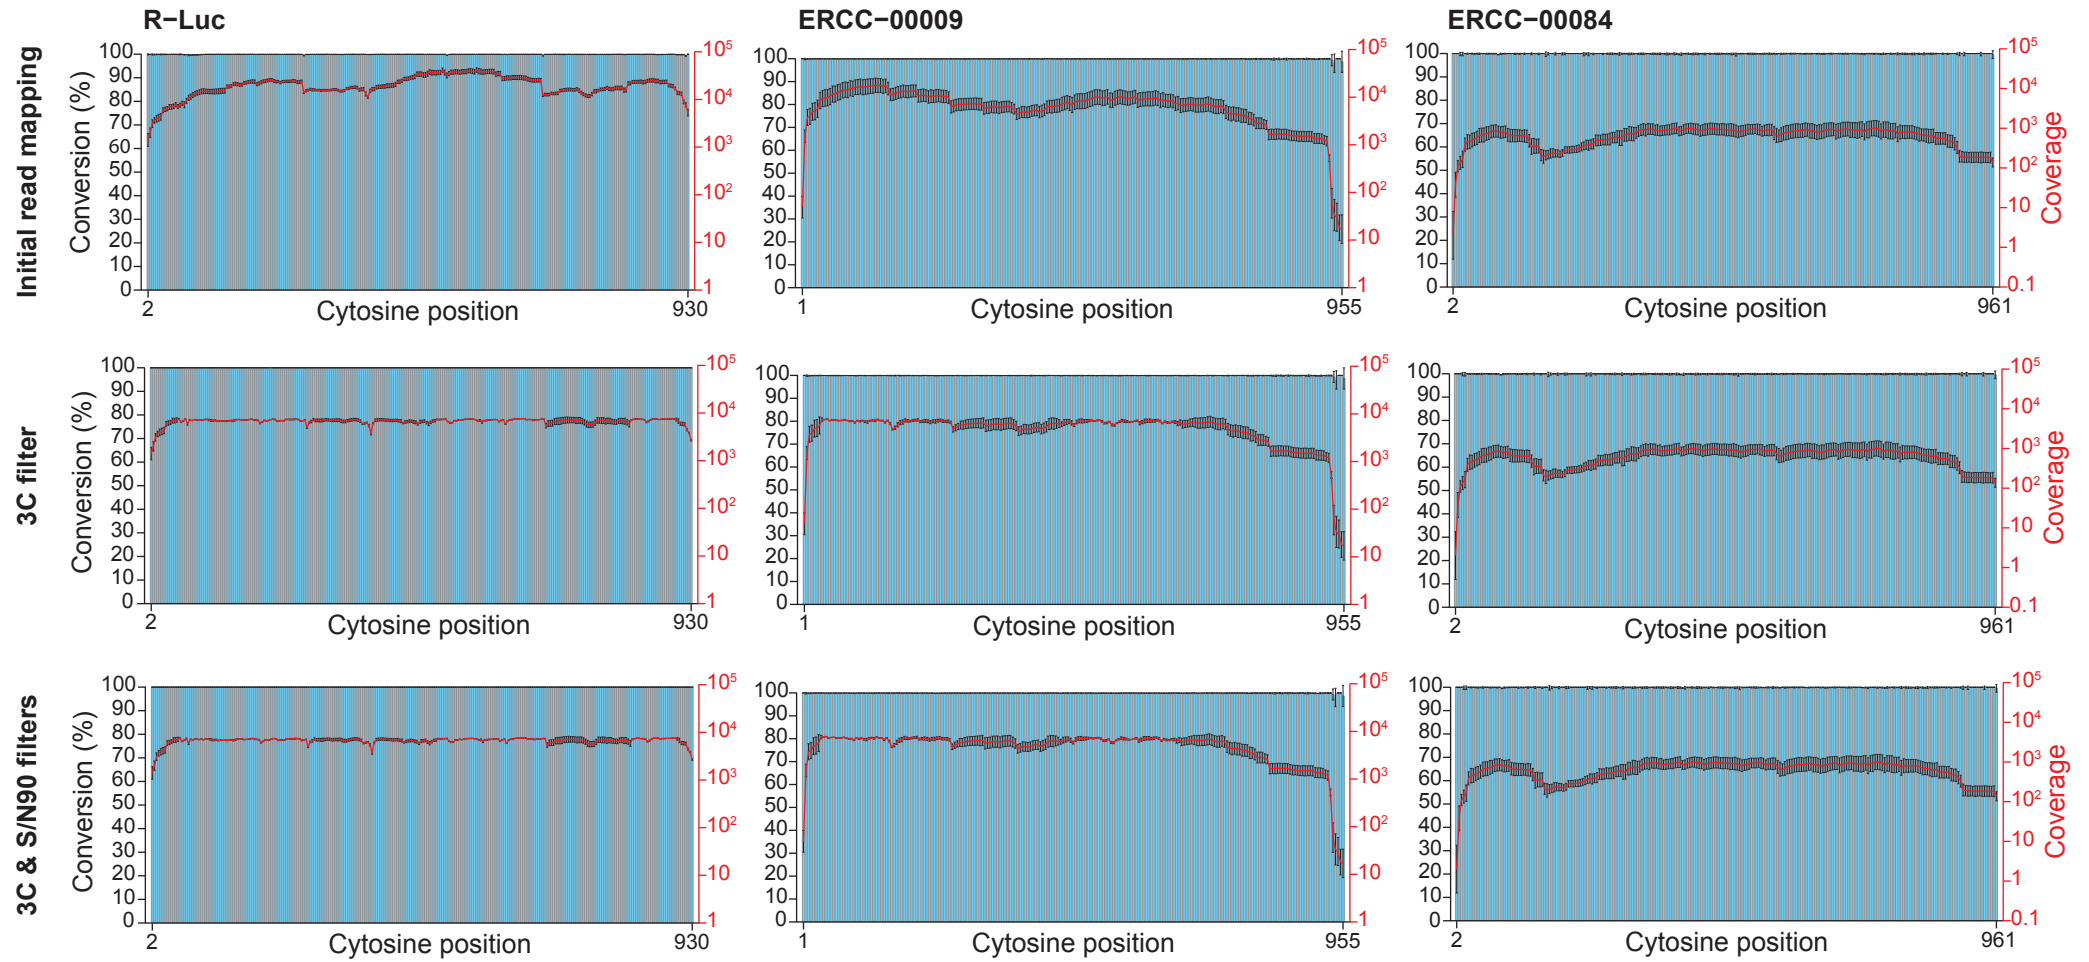

Figure S3B:

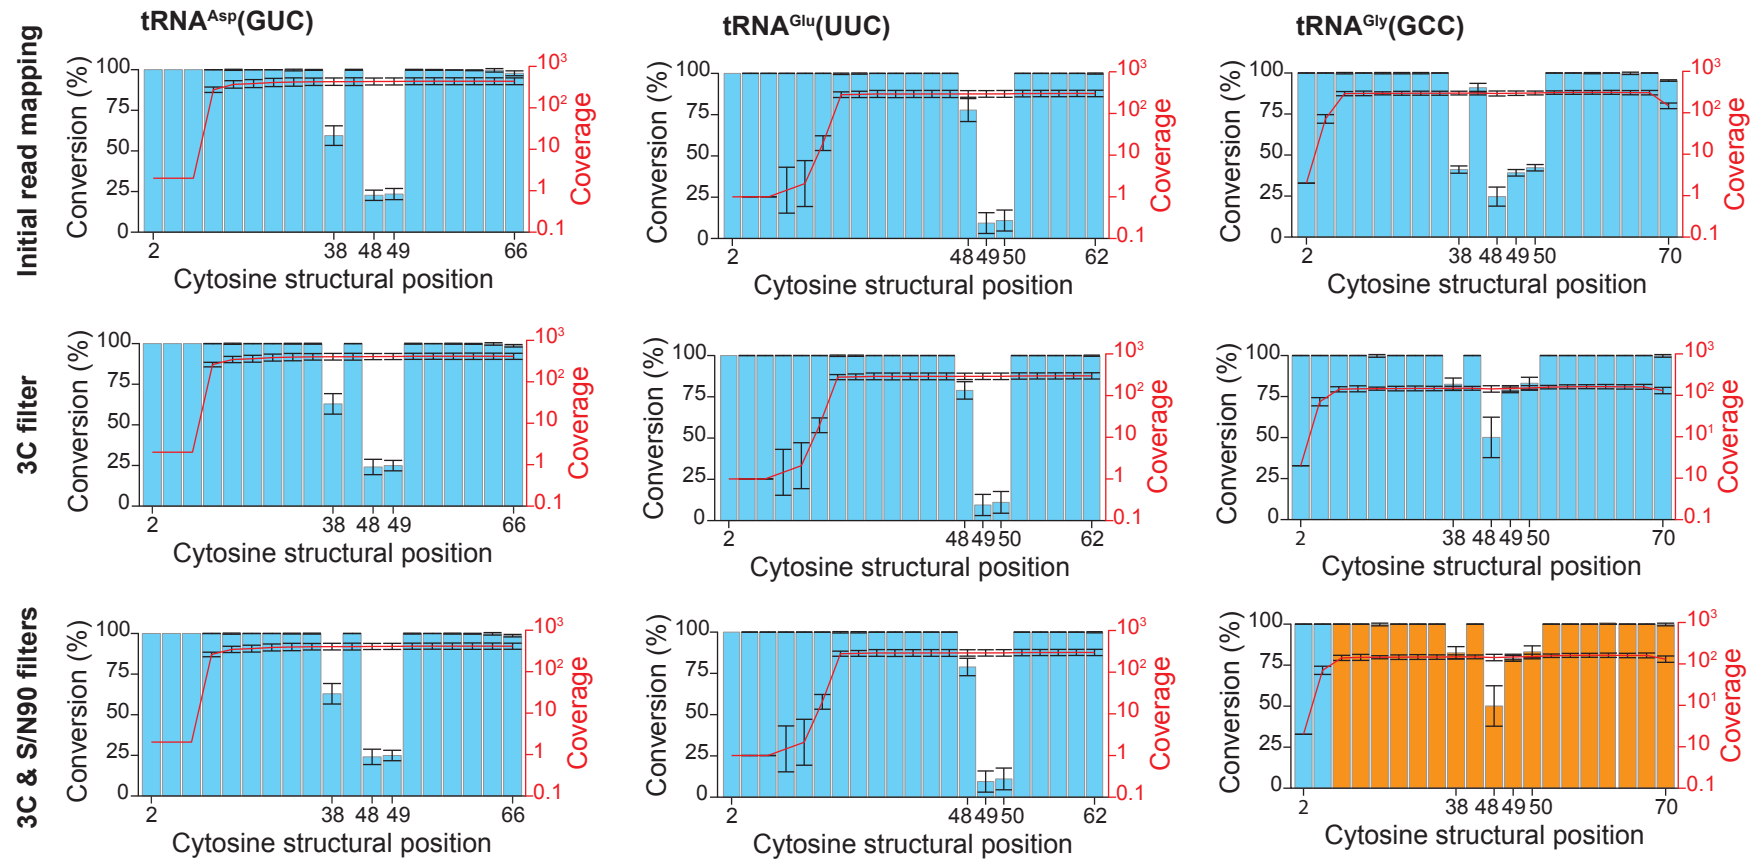

Figure S3C:

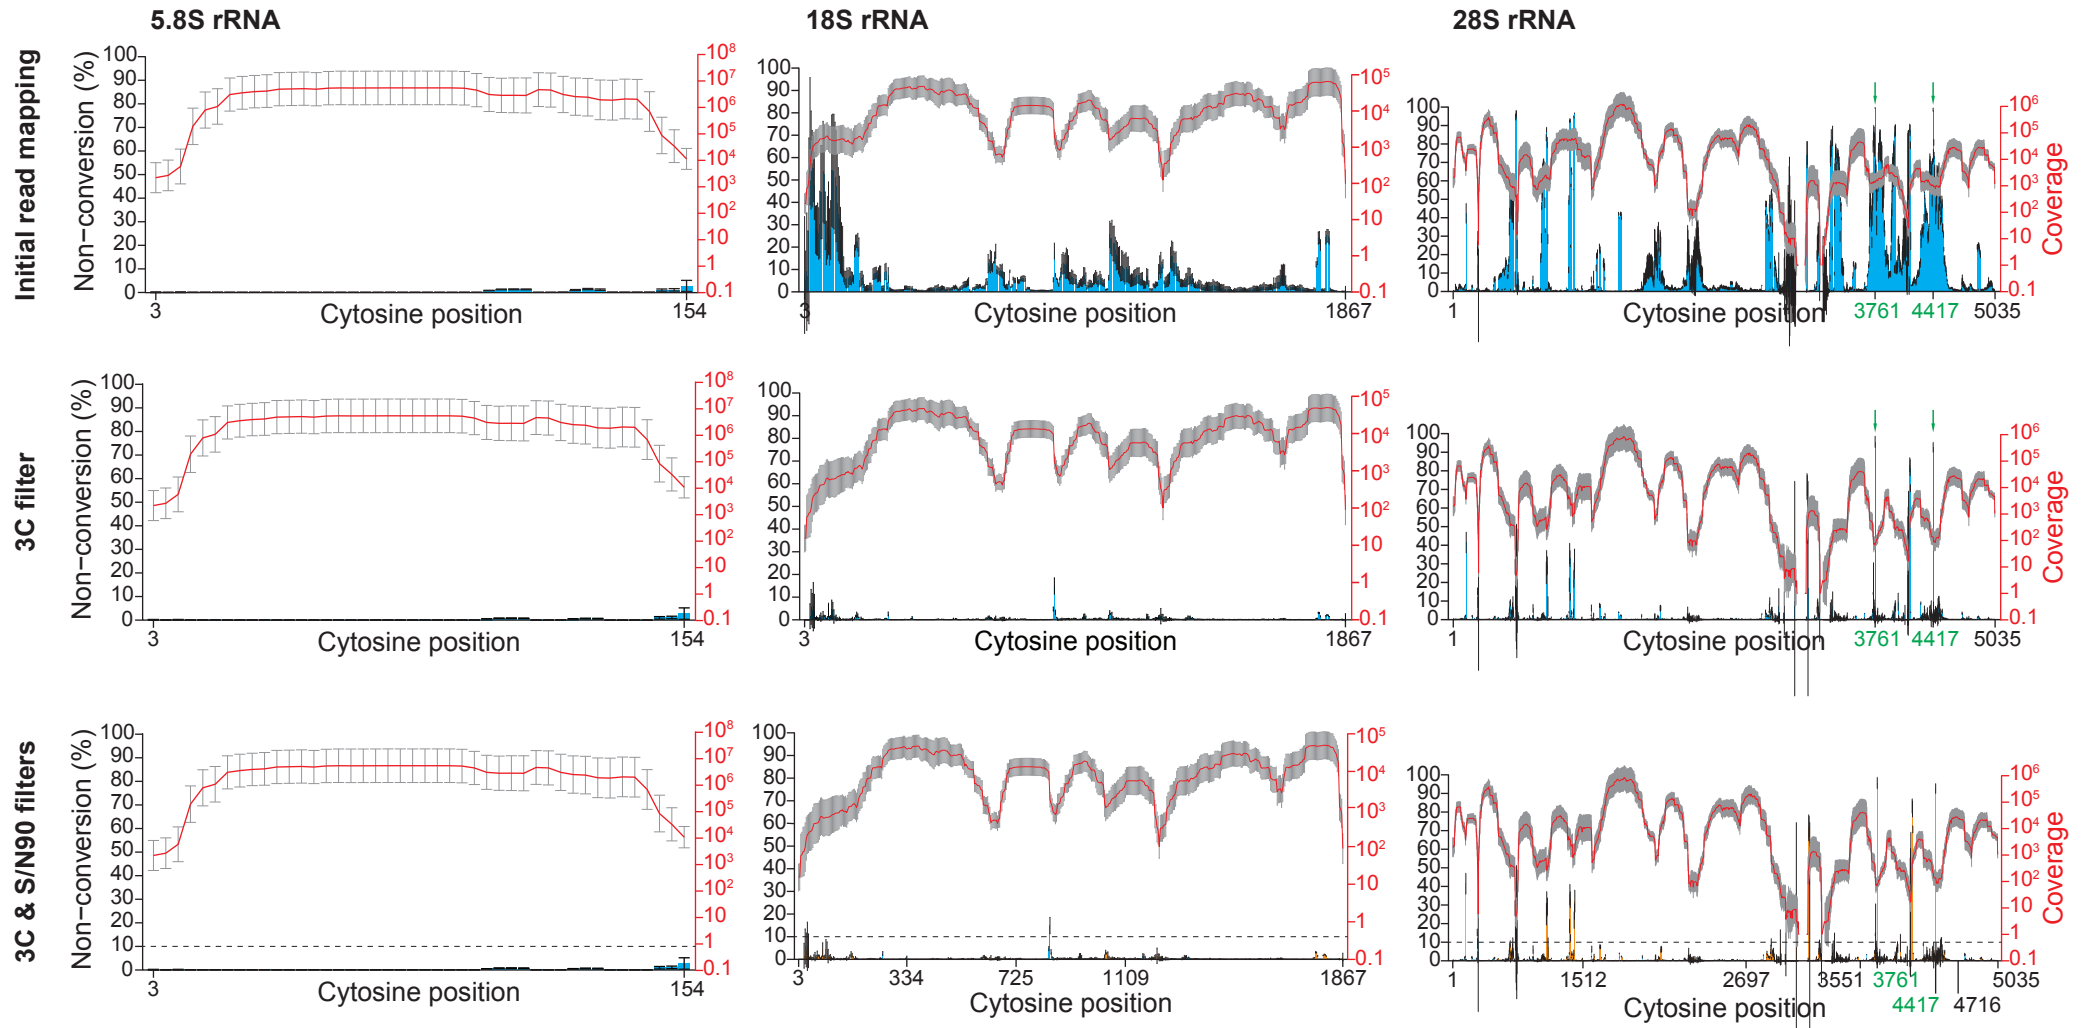

Figure S3C continued:

18S and 28S rRNA zoomed plots

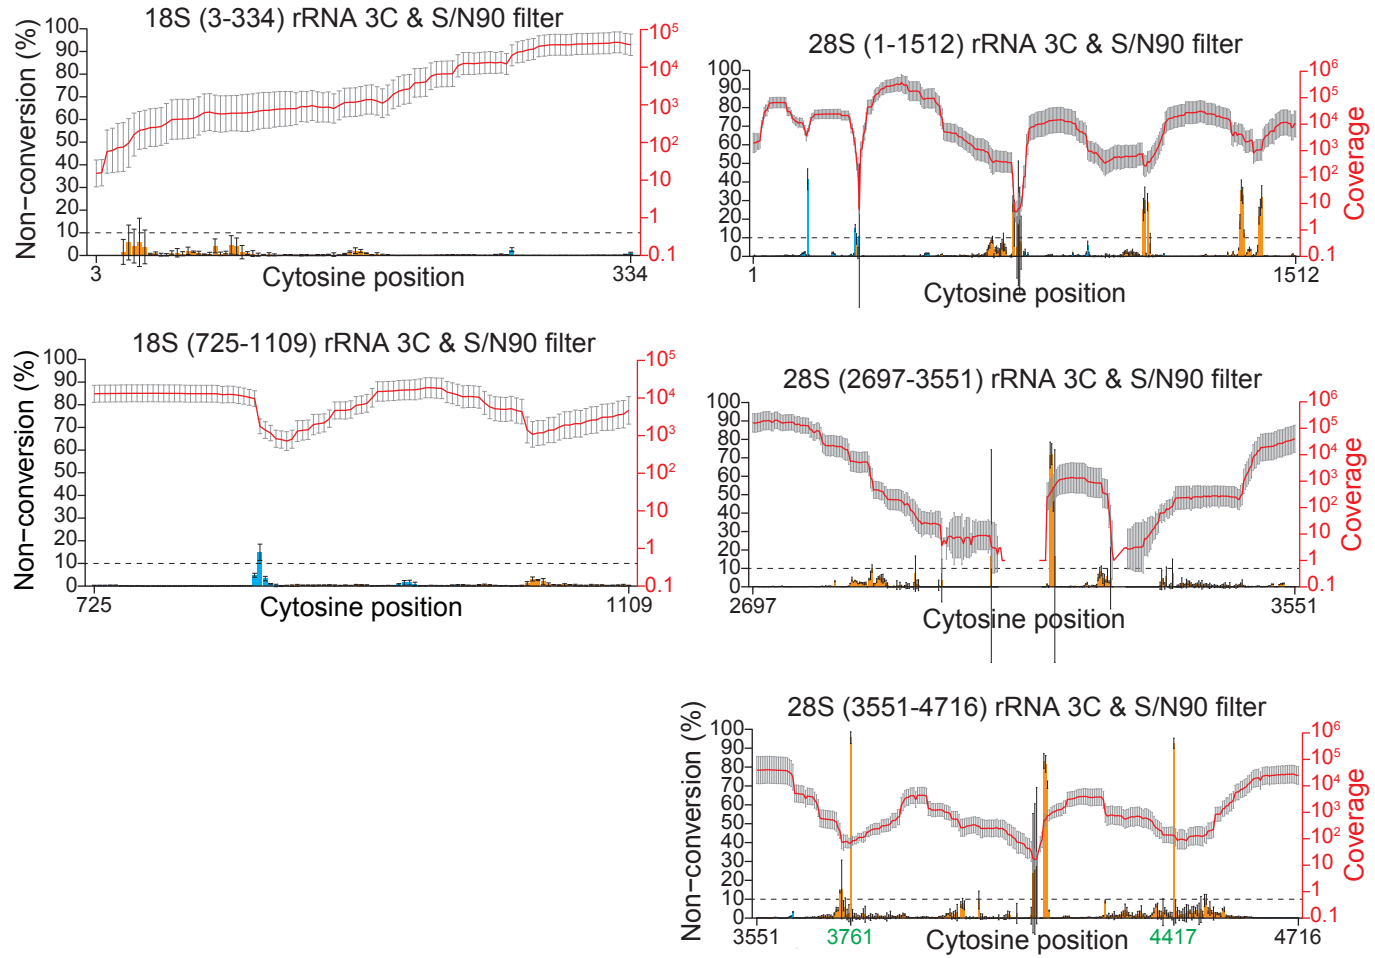

Supplement: 12915_2020_769_MOESM7_ESM.pdf [file 12915_2020_769_MOESM7_ESM.pdf]
