# Supplementary material for: Multiple links between 5-methylcytosine content of mRNA and translation
Source: PubMed Central journal article supplement (PMC7158060; doi:10.1186/s12915-020-00769-5), 2020-04-15
Supplement: 12915_2020_769_MOESM9_ESM.pdf [file 12915_2020_769_MOESM9_ESM.pdf]

**Figure S4:**

**A** 3C & S/N90 and 80CT, 30RC, 5C

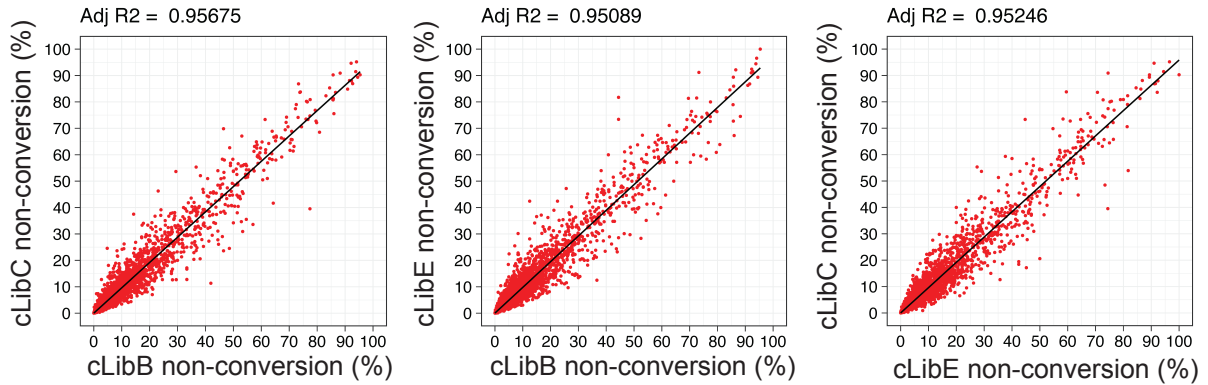

**B** 80CT, 30RC, 5C, 10MM

| candidate sites | Raw data | 3C filter | 3C & S/N90 filter |
|-----------------|----------|-----------|-------------------|
| rRNA            | 885      | 34        | 5                 |
| tRNA            | 177      | 156       | 119               |
| spike-ins       | 0        | 0         | 0                 |
| transcriptome   | 8,250    | 1,808     | 1,034             |

**C**

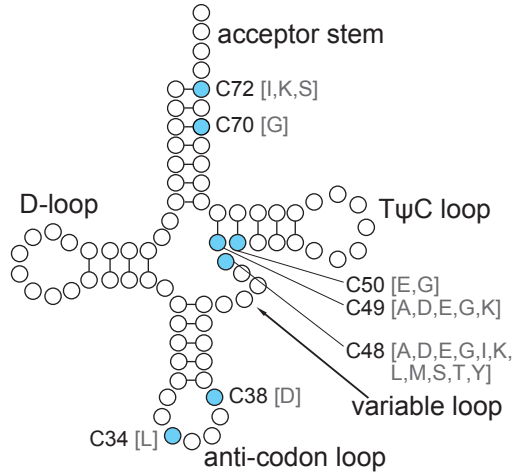

**D**

|   | A                       | G                       | U                       | C                       |   |
|---|-------------------------|-------------------------|-------------------------|-------------------------|---|
| A | AAA tRNA <sup>Phe</sup> | AGA                     | AUA tRNA <sup>Tyr</sup> | ACA tRNA <sup>Cys</sup> | A |
| G | GAA                     | GGA tRNA <sup>Ser</sup> | GUA                     | GCA                     |   |
| U | UAA tRNA <sup>Leu</sup> | UGA                     | UUA tRNA <sup>Sup</sup> | UCA tRNA <sup>Sup</sup> |   |
| C | CAA                     | CGA                     | CUA                     | CCA tRNA <sup>Trp</sup> |   |
| A | AAG                     | AGG                     | AUG tRNA <sup>His</sup> | ACG                     | G |
| G | GAG tRNA <sup>Leu</sup> | GGG tRNA <sup>Pro</sup> | GUG                     | GCG tRNA <sup>Arg</sup> |   |
| U | UAG                     | UGG tRNA <sup>Gln</sup> | UUG tRNA <sup>Gln</sup> | UCG tRNA <sup>Arg</sup> |   |
| C | CAG                     | CGG                     | CUG                     | CCG                     |   |
| A | AAU                     | AGU                     | AUU tRNA <sup>Asn</sup> | ACU tRNA <sup>Ser</sup> | U |
| G | GAU tRNA <sup>Ile</sup> | GGU tRNA <sup>Thr</sup> | GUU                     | GCU tRNA <sup>Ser</sup> |   |
| U | UAU                     | UGU                     | UUU tRNA <sup>Lys</sup> | UCU tRNA <sup>Arg</sup> |   |
| C | CAU tRNA <sup>Met</sup> | CGU                     | CUU                     | CCU tRNA <sup>Arg</sup> |   |
| A | AAC                     | AGC                     | AUC tRNA <sup>Asp</sup> | ACC                     | C |
| G | GAC tRNA <sup>Val</sup> | GGC tRNA <sup>Ala</sup> | GUC                     | GCC tRNA <sup>Gly</sup> |   |
| U | UAC                     | UGC tRNA <sup>Glu</sup> | UUC                     | UCC tRNA <sup>Gly</sup> |   |
| C | CAC                     | CGC                     | CUC                     | CCC                     |   |
