# Supplementary material for: Multiple links between 5-methylcytosine content of mRNA and translation
Source: PubMed Central journal article supplement (PMC7158060; doi:10.1186/s12915-020-00769-5), 2020-04-15

**Figure S9:**

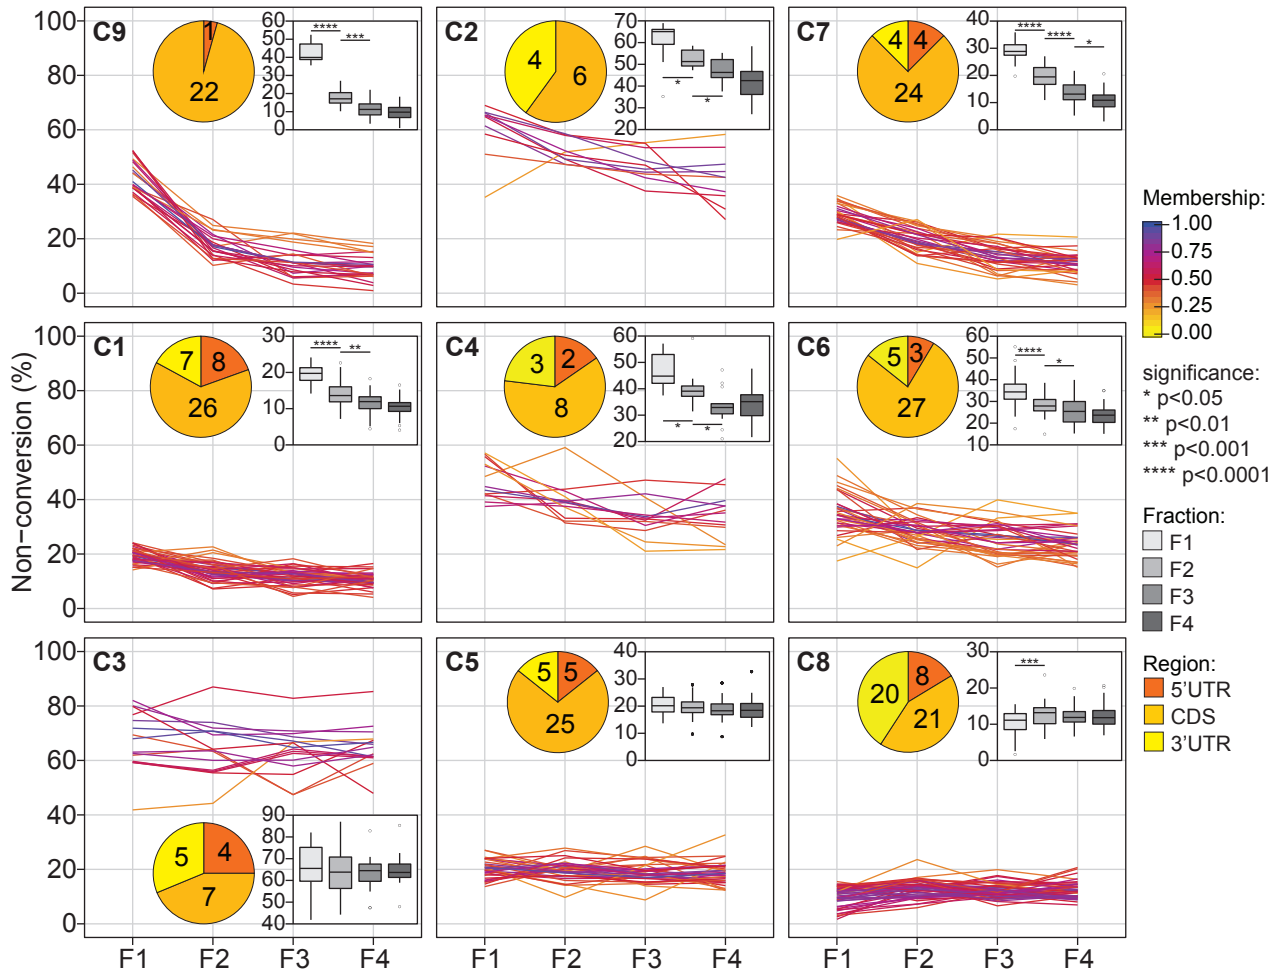

Supplement: 12915_2020_769_MOESM17_ESM.pdf [file 12915_2020_769_MOESM17_ESM.pdf]
